# Supplementary material for: A Mixed-Methods Evaluation of Mainstreaming Mass Drug Administration for Schistosomiasis and Soil-Transmitted Helminthiasis in Four Districts of Nigeria
Source: PubMed Central journal article supplement (PMC11376119; doi:10.4269/ajtmh.23-0600), 2024-04-09
Supplement: tpmd230600.SD1.pdf [file tpmd230600.SD1.pdf]

**Supplemental Table S1**

**Selection Criteria for Participation in Qualitative Study**

| <b>Group</b>             | <b>Participants</b>                                                                                                                                                                                                                                                                                                                                                                                                                                                                                                                                                                                                                                                                                                                                                                                                                                                                                                                                                                                                                                                                                                                         |
|--------------------------|---------------------------------------------------------------------------------------------------------------------------------------------------------------------------------------------------------------------------------------------------------------------------------------------------------------------------------------------------------------------------------------------------------------------------------------------------------------------------------------------------------------------------------------------------------------------------------------------------------------------------------------------------------------------------------------------------------------------------------------------------------------------------------------------------------------------------------------------------------------------------------------------------------------------------------------------------------------------------------------------------------------------------------------------------------------------------------------------------------------------------------------------|
| Key Informant Interviews | Participants were selected based on their position in the program as government officials in ministry of health, Primary Health Care (PHC), Education, and Universal Basic Education Boards. They had direct roles and responsibilities in the decision making, approval processes, fund releases, planning, implementation, monitoring and supervision, training of teachers and community drug distributors (CDDs), and reporting. These officers were selected at State and LGA levels. At state level, permanent secretaries, directors, NTD program coordinators and team members were included. At the Ministry of Education, similar cadres were selected. At planning and economic/budget departments, Finance and information ministries, we interviewed consenting directors. At the LGA level, we interviewed the LGA heads of administration, Directors of PHC, NTD Program officers as well as their team members. In the LGA, we interviewed education secretaries and Chief inspectors of education. At the ministry of Education, we interviewed directors of schools or any desk officer in charge school health services. |
| Focus Group Discussions  | Discussions were organized for the distributors - teachers, CDDs, parents-teachers associations, community leaders (male and female), and frontline health workers who distribute or train CDDs or involved in drug logistics.                                                                                                                                                                                                                                                                                                                                                                                                                                                                                                                                                                                                                                                                                                                                                                                                                                                                                                              |

**Supplemental Table S2**

**Distribution of Key Informant Interviews by Participants' Area of Responsibility**

|                 | Pre-Mainstreaming |            |           | During Mainstreaming |            |           | Post-Mainstreaming |            |           |  |
|-----------------|-------------------|------------|-----------|----------------------|------------|-----------|--------------------|------------|-----------|--|
|                 | Education         | Government | Health    | Education            | Government | Health    | Education          | Government | Health    |  |
| <b>Delta</b>    |                   |            |           |                      |            |           |                    |            |           |  |
| State           | 5                 | 2          | 8         | 2                    | 1          | 10        | 2                  | 0          | 2         |  |
| LGA/Community   | 5                 | 1          | 4         | 0                    | 0          | 0         | 2                  | 1          | 2         |  |
| <b>Edo</b>      |                   |            |           |                      |            |           |                    |            |           |  |
| State           | 10                | 0          | 7         | 1                    | 0          | 9         | 4                  | 0          | 6         |  |
| LGA/Community   | 2                 | 1          | 2         | 2                    | 2          | 5         | 3                  | 0          | 9         |  |
| <b>Nasarawa</b> |                   |            |           |                      |            |           |                    |            |           |  |
| State           | 2                 | 0          | 2         | 0                    | 0          | 0         | 0                  | 0          | 6         |  |
| LGA/Community   | 5                 | 1          | 4         | 3                    | 4          | 3         | 2                  | 0          | 2         |  |
| <b>Plateau</b>  |                   |            |           |                      |            |           |                    |            |           |  |
| State           | 3                 | 0          | 5         | 5                    | 1          | 5         | 3                  | 0          | 5         |  |
| LGA/Community   | 0                 | 0          | 2         | 0                    | 0          | 0         | 0                  | 0          | 0         |  |
| <b>TOTAL</b>    | <b>32</b>         | <b>5</b>   | <b>34</b> | <b>13</b>            | <b>8</b>   | <b>32</b> | <b>16</b>          | <b>1</b>   | <b>32</b> |  |

In total, 173 Key Informant Interviews were conducted across the study.

**Table S3. Mebendazole Coverage Among School-Aged Children by Characteristic and District, Pre- and Post-Mainstreaming**

|                                      | Pre-Mainstreaming (2021) |                         |                                     |                      | Post-Mainstreaming (2022) |                         |                                     |                      | Pre- vs. Post-<br>p-value <sup>2</sup> |
|--------------------------------------|--------------------------|-------------------------|-------------------------------------|----------------------|---------------------------|-------------------------|-------------------------------------|----------------------|----------------------------------------|
|                                      | SAC (5-14 years)<br>(n)  | Took MEB during MDA (n) | Weighted coverage estimate (95% CI) | p-value <sup>1</sup> | SAC (5-14 years)<br>(n)   | Took MEB during MDA (n) | Weighted coverage estimate (95% CI) | p-value <sup>1</sup> |                                        |
| <b>District: Bassa</b>               |                          |                         |                                     |                      |                           |                         |                                     |                      |                                        |
| <b>Bassa Total</b>                   | 1,405                    | 982                     | 69.9% (57.0 – 80.2%)                |                      | 1,293                     | 784                     | 60.6% (49.9 – 70.5%)                |                      | 0.25                                   |
| <b>Gender</b>                        |                          |                         |                                     |                      |                           |                         |                                     |                      |                                        |
| Male                                 | 723                      | 514                     | 71.1% (58.0 – 81.4%)                |                      | 673                       | 416                     | 61.8% (50.6 – 71.9%)                |                      |                                        |
| Female                               | 682                      | 468                     | 68.6% (55.5 – 79.3%)                | 0.26                 | 620                       | 368                     | 59.4% (48.4 – 69.4%)                | 0.31                 |                                        |
| <b>Wealth Quintile<sup>3</sup></b>   |                          |                         |                                     |                      |                           |                         |                                     |                      |                                        |
| Lowest 20%                           | 359                      | 272                     | 75.8% (62.2 – 85.6%)                |                      | 544                       | 356                     | 65.4% (53.1 – 76.0%)                |                      |                                        |
| >20-40%                              | 499                      | 338                     | 67.7% (46.7 – 83.4%)                |                      | 368                       | 227                     | 61.7% (47.3 – 74.3%)                |                      |                                        |
| >40-60%                              | 280                      | 207                     | 73.9% (54.9 – 86.9%)                |                      | 222                       | 134                     | 60.4% (41.7 – 76.5%)                |                      |                                        |
| >60-80%                              | 176                      | 113                     | 64.2% (48.7 – 77.2%)                |                      | 112                       | 51                      | 45.5% (15.7 – 78.9%)                |                      |                                        |
| Top 20%                              | 84                       | 47                      | 56.0% (42.1 – 68.9%)                | 0.29                 | 28                        | 7                       | 25.0% (5.9 – 63.9%)                 | 0.23                 |                                        |
| <b>School Attendance<sup>4</sup></b> |                          |                         |                                     |                      |                           |                         |                                     |                      |                                        |
| Unenrolled/poor                      | 221                      | 48                      | 21.7% (9.0 – 43.8%)                 |                      | 226                       | 98                      | 43.4% (20.5 – 69.5%)                |                      |                                        |
| Good attendance                      | 1,177                    | 930                     | 79.0% (68.4 – 86.7%)                | <0.01                | 1,062                     | 684                     | 64.4% (53.2 – 74.2%)                | 0.13                 |                                        |
| <b>School Type</b>                   |                          |                         |                                     |                      |                           |                         |                                     |                      |                                        |
| Private, boarding, other             | 378                      | 290                     | 76.7% (63.0 – 86.4%)                |                      | 236                       | 84                      | 35.6% (19.0 – 56.6%)                |                      |                                        |
| Public                               | 796                      | 636                     | 79.9% (67.6 – 88.3%)                | 0.61                 | 824                       | 602                     | 73.1% (64.6 – 80.1%)                | <0.01                |                                        |
| <b>District: Egor</b>                |                          |                         |                                     |                      |                           |                         |                                     |                      |                                        |
| <b>Egor Total</b>                    | 1,005                    | 796                     | 79.2% (70.6 – 85.8%)                |                      | 1,547                     | 1,343                   | 86.8% (76.4 – 93.0%)                |                      | 0.18                                   |
| <b>Gender</b>                        |                          |                         |                                     |                      |                           |                         |                                     |                      |                                        |
| Male                                 | 510                      | 400                     | 78.4% (69.3 – 85.4%)                |                      | 774                       | 671                     | 86.7% (76.0 – 93.0%)                |                      |                                        |

|                                      | Pre-Mainstreaming (2021) |                         |                                     |                      | Post-Mainstreaming (2022) |                         |                                     |                      | Pre- vs. Post-p-value <sup>2</sup> |
|--------------------------------------|--------------------------|-------------------------|-------------------------------------|----------------------|---------------------------|-------------------------|-------------------------------------|----------------------|------------------------------------|
|                                      | SAC (5-14 years) (n)     | Took MEB during MDA (n) | Weighted coverage estimate (95% CI) | p-value <sup>1</sup> | SAC (5-14 years) (n)      | Took MEB during MDA (n) | Weighted coverage estimate (95% CI) | p-value <sup>1</sup> |                                    |
| <i>Female</i>                        | 495                      | 396                     | 80.0% (71.1 – 86.7%)                | 0.53                 | 773                       | 672                     | 86.9% (76.6 – 93.1%)                | 0.83                 |                                    |
| <b>Wealth Quintile<sup>3</sup></b>   |                          |                         |                                     |                      |                           |                         |                                     |                      |                                    |
| <i>Lowest 20%</i>                    | 0                        | --                      | --                                  |                      | 0                         | --                      | --                                  |                      |                                    |
| <i>&gt;20-40%</i>                    | 0                        | --                      | --                                  |                      | 0                         | --                      | --                                  |                      |                                    |
| <i>&gt;40-60%</i>                    | 15                       | 14                      | 93.3% (52.3 – 99.4%)                |                      | 68                        | 55                      | 80.9% (54.6 – 93.7%)                |                      |                                    |
| <i>&gt;60-80%</i>                    | 232                      | 194                     | 83.6% (69.1 – 92.1%)                |                      | 464                       | 433                     | 93.3% (83.8 – 97.4%)                |                      |                                    |
| <i>Top 20%</i>                       | 758                      | 588                     | 77.6% (68.2 – 84.8%)                | 0.27                 | 1,015                     | 855                     | 84.2% (71.8 – 91.8%)                | 0.27                 |                                    |
| <b>School Attendance<sup>4</sup></b> |                          |                         |                                     |                      |                           |                         |                                     |                      |                                    |
| <i>Unenrolled/poor</i>               | 38                       | 34                      | 89.5% (74.9 – 96.0%)                |                      | 8                         | 8                       | 100% (n/a)                          |                      |                                    |
| <i>Good attendance</i>               | 963                      | 760                     | 78.9% (70.1 – 85.7%)                | 0.10                 | 1,538                     | 1,335                   | 86.8% (76.4 – 93.1%)                | n/a                  |                                    |
| <b>School Type</b>                   |                          |                         |                                     |                      |                           |                         |                                     |                      |                                    |
| <i>Private, boarding, other</i>      | 714                      | 539                     | 75.5% (66.4 – 82.8%)                |                      | 1,071                     | 917                     | 85.6% (73.1 – 92.9%)                |                      |                                    |
| <i>Public</i>                        | 254                      | 225                     | 88.6% (80.8 – 93.5%)                | <b>&lt;0.01</b>      | 438                       | 393                     | 89.7% (82.1 – 94.3%)                | 0.26                 |                                    |
| <b>District: Ughelli South</b>       |                          |                         |                                     |                      |                           |                         |                                     |                      |                                    |
| <b>Ughelli South Total</b>           | 1,267                    | 1,065                   | 84.1% (75.5 – 90.0%)                |                      | 1,507                     | 1,102                   | 73.1% (65.8 – 79.4%)                |                      | <b>0.03</b>                        |
| <b>Gender</b>                        |                          |                         |                                     |                      |                           |                         |                                     |                      |                                    |
| <i>Male</i>                          | 622                      | 524                     | 84.2% (76.7 – 89.7%)                |                      | 796                       | 572                     | 72.2% (64.3 – 78.9%)                |                      |                                    |
| <i>Female</i>                        | 645                      | 541                     | 83.9% (73.9 – 90.5%)                | 0.85                 | 711                       | 530                     | 74.2% (66.8 – 80.4%)                | 0.34                 |                                    |
| <b>Wealth Quintile<sup>3</sup></b>   |                          |                         |                                     |                      |                           |                         |                                     |                      |                                    |
| <i>Lowest 20%</i>                    | 384                      | 343                     | 89.3% (83.2 – 93.4%)                |                      | 210                       | 184                     | 86.0% (73.7 – 93.1%)                |                      |                                    |
| <i>&gt;20-40%</i>                    | 241                      | 224                     | 92.9% (86.4 – 96.5%)                |                      | 248                       | 206                     | 84.1% (76.2 – 89.7%)                |                      |                                    |
| <i>&gt;40-60%</i>                    | 302                      | 257                     | 85.1% (72.2 – 92.6%)                |                      | 417                       | 303                     | 72.5% (63.2 – 80.2%)                |                      |                                    |

|                                      | Pre-Mainstreaming (2021) |                         |                                     |                      | Post-Mainstreaming (2022) |                         |                                     |                      | Pre- vs. Post-<br>p-value <sup>2</sup> |
|--------------------------------------|--------------------------|-------------------------|-------------------------------------|----------------------|---------------------------|-------------------------|-------------------------------------|----------------------|----------------------------------------|
|                                      | SAC (5-14 years)<br>(n)  | Took MEB during MDA (n) | Weighted coverage estimate (95% CI) | p-value <sup>1</sup> | SAC (5-14 years)<br>(n)   | Took MEB during MDA (n) | Weighted coverage estimate (95% CI) | p-value <sup>1</sup> |                                        |
| >60-80%                              | 212                      | 146                     | 68.9% (49.0 – 83.6%)                |                      | 369                       | 252                     | 68.7% (57.5 – 78.0%)                |                      |                                        |
| Top 20%                              | 128                      | 95                      | 74.2% (58.7 – 85.4%)                | <b>0.01</b>          | 245                       | 140                     | 57.5% (46.2 – 68.0%)                | <b>&lt;0.01</b>      |                                        |
| <b>School Attendance<sup>4</sup></b> |                          |                         |                                     |                      |                           |                         |                                     |                      |                                        |
| Unenrolled/poor                      | 20                       | 12                      | 60.0% (40.4 – 76.8%)                |                      | 56                        | 18                      | 30.2% (16.6 – 48.5%)                |                      |                                        |
| Good attendance                      | 1,237                    | 1,045                   | 84.5% (75.7 – 90.5%)                | <b>0.01</b>          | 1,430                     | 1,070                   | 74.7% (67.2 – 81.0%)                | <b>&lt;0.01</b>      |                                        |
| <b>School Type</b>                   |                          |                         |                                     |                      |                           |                         |                                     |                      |                                        |
| Private, boarding, other             | 436                      | 312                     | 71.6% (57.7 – 82.2%)                |                      | 696                       | 460                     | 65.6% (54.5 – 75.2%)                |                      |                                        |
| Public                               | 814                      | 743                     | 91.3% (84.6 – 95.2%)                | <b>0.001</b>         | 710                       | 586                     | 82.8% (74.5 – 88.8%)                | <b>0.006</b>         |                                        |
| <b>District: Wamba</b>               |                          |                         |                                     |                      |                           |                         |                                     |                      |                                        |
| <b>Wamba Total</b>                   | 1,764                    | 1,502                   | 85.1% (76.2 – 91.1%)                |                      | 1,442                     | 1,142                   | 79.2% (71.7 – 85.1%)                |                      | 0.24                                   |
| <b>Gender</b>                        |                          |                         |                                     |                      |                           |                         |                                     |                      |                                        |
| Male                                 | 920                      | 781                     | 84.9% (75.2 – 91.3%)                |                      | 763                       | 602                     | 78.9% (71.1 – 85.0%)                |                      |                                        |
| Female                               | 844                      | 721                     | 85.4% (76.9 – 91.2%)                | 0.75                 | 679                       | 540                     | 79.5% (71.4 – 85.8%)                | 0.80                 |                                        |
| <b>Wealth Quintile<sup>3</sup></b>   |                          |                         |                                     |                      |                           |                         |                                     |                      |                                        |
| Lowest 20%                           | 232                      | 183                     | 78.9% (60.5 – 90.1%)                |                      | 257                       | 196                     | 76.3% (67.0 – 83.5%)                |                      |                                        |
| >20-40%                              | 339                      | 293                     | 86.4% (76.5 – 92.6%)                |                      | 373                       | 282                     | 75.6% (61.9 – 85.5%)                |                      |                                        |
| >40-60%                              | 481                      | 429                     | 89.2% (79.6 – 94.6%)                |                      | 419                       | 329                     | 78.5% (67.7 – 86.4%)                |                      |                                        |
| >60-80%                              | 512                      | 433                     | 84.6% (71.4 – 92.3%)                |                      | 297                       | 256                     | 86.2% (73.5 – 93.4%)                |                      |                                        |
| Top 20%                              | 199                      | 163                     | 81.9% (56.5 – 94.0%)                | 0.90                 | 84                        | 71                      | 84.5% (64.1 – 94.4%)                | 0.19                 |                                        |
| <b>School Attendance<sup>4</sup></b> |                          |                         |                                     |                      |                           |                         |                                     |                      |                                        |
| Unenrolled/poor                      | 34                       | 16                      | 47.1% (28.1 – 67.0%)                |                      | 166                       | 64                      | 38.6% (23.3 – 56.4%)                |                      |                                        |
| Good attendance                      | 1,717                    | 1,476                   | 86.0% (77.0 – 91.8%)                | <b>&lt;0.01</b>      | 1,269                     | 1,075                   | 84.7% (78.9 – 89.2%)                | <b>&lt;0.01</b>      |                                        |

|                                      | Pre-Mainstreaming (2021)       |                         |                                     |                      | Post-Mainstreaming (2022) |                         |                                     |                      | Pre- vs. Post-p-value <sup>2</sup> |
|--------------------------------------|--------------------------------|-------------------------|-------------------------------------|----------------------|---------------------------|-------------------------|-------------------------------------|----------------------|------------------------------------|
|                                      | SAC (5-14 years) (n)           | Took MEB during MDA (n) | Weighted coverage estimate (95% CI) | p-value <sup>1</sup> | SAC (5-14 years) (n)      | Took MEB during MDA (n) | Weighted coverage estimate (95% CI) | p-value <sup>1</sup> |                                    |
| <b>School Type</b>                   |                                |                         |                                     |                      |                           |                         |                                     |                      |                                    |
| Private, boarding, other             | 228                            | 129                     | 56.6% (44.9 – 67.6%)                |                      | 422                       | 341                     | 80.8% (75.3 – 85.3%)                |                      |                                    |
| Public                               | 1,489                          | 1,346                   | 90.4% (83.0 – 94.8%)                | <b>&lt;0.01</b>      | 851                       | 731                     | 85.9% (78.8 – 90.9%)                | 0.10                 |                                    |
|                                      | <b>Total for all districts</b> |                         |                                     |                      |                           |                         |                                     |                      |                                    |
| <b>Total</b>                         | 5,441                          | 4,345                   | 80.9% (76.3 – 84.9%)                |                      | 5,789                     | 4,371                   | 75.9% (71.6 – 79.7%)                |                      | 0.09                               |
| <b>Gender</b>                        |                                |                         |                                     |                      |                           |                         |                                     |                      |                                    |
| Male                                 | 2,775                          | 2,219                   | 81.0% (76.3 – 84.9%)                |                      | 3,006                     | 2,261                   | 75.4% (70.9 – 79.4%)                |                      |                                    |
| Female                               | 2,666                          | 2,126                   | 80.9% (76.0 – 85.0%)                | 0.94                 | 2,783                     | 2,110                   | 76.3% (71.9 – 80.2%)                | 0.42                 |                                    |
| <b>Wealth Quintile<sup>3</sup></b>   |                                |                         |                                     |                      |                           |                         |                                     |                      |                                    |
| Lowest 20%                           | 975                            | 798                     | 83.8% (77.8 – 88.5%)                |                      | 1,011                     | 736                     | 75.4% (67.7 – 81.8%)                |                      |                                    |
| >20-40%                              | 1,079                          | 855                     | 82.2% (72.4 – 89.1%)                |                      | 989                       | 715                     | 75.5% (68.5 – 81.4%)                |                      |                                    |
| >40-60%                              | 1,078                          | 907                     | 84.8% (77.8 – 90.0%)                |                      | 1,126                     | 821                     | 73.3% (66.8 – 78.8%)                |                      |                                    |
| >60-80%                              | 1,132                          | 886                     | 77.8% (69.3 – 84.5%)                |                      | 1,242                     | 992                     | 78.5% (70.8 – 84.6%)                |                      |                                    |
| Top 20%                              | 1,169                          | 893                     | 76.6% (69.4 – 82.6%)                | 0.12                 | 1,372                     | 1,073                   | 76.1% (66.8 – 83.5%)                | 0.70                 |                                    |
| <b>School Attendance<sup>4</sup></b> |                                |                         |                                     |                      |                           |                         |                                     |                      |                                    |
| Unenrolled/poor                      | 313                            | 110                     | 39.1% (24.4 – 56.1%)                |                      | 456                       | 188                     | 39.8% (27.7 – 53.3%)                |                      |                                    |
| Good attendance                      | 5,094                          | 4,211                   | 83.0% (78.6 – 86.7%)                | <b>&lt;0.01</b>      | 5,299                     | 4,164                   | 78.5% (74.2 – 82.3%)                | <b>&lt;0.01</b>      |                                    |
| <b>School Type</b>                   |                                |                         |                                     |                      |                           |                         |                                     |                      |                                    |
| Private, boarding, other             | 1,756                          | 1,270                   | 72.1% (65.7 – 77.7%)                |                      | 2,425                     | 1,802                   | 73.4% (66.7 – 79.3%)                |                      |                                    |
| Public                               | 3,353                          | 2,950                   | 88.8% (84.7 – 91.9%)                | <b>&lt;0.01</b>      | 2,823                     | 2,312                   | 82.7% (78.5 – 86.2%)                | <b>0.008</b>         |                                    |

| Pre-Mainstreaming (2021) |                         |                                     |                      | Post-Mainstreaming (2022) |                         |                                     |                      | Pre- vs. Post-<br>p-value <sup>2</sup> |
|--------------------------|-------------------------|-------------------------------------|----------------------|---------------------------|-------------------------|-------------------------------------|----------------------|----------------------------------------|
| SAC (5-14 years)<br>(n)  | Took MEB during MDA (n) | Weighted coverage estimate (95% CI) | p-value <sup>1</sup> | SAC (5-14 years)<br>(n)   | Took MEB during MDA (n) | Weighted coverage estimate (95% CI) | p-value <sup>1</sup> |                                        |

Abbreviations: MDA = Mass drug administration; MEB = Mebendazole; n/a = Not applicable; SAC = School-aged children, 5-14 years

*Bolded p-values are those that are <0.05.*

1. p-value testing the difference between proportions of coverage by category of gender, wealth quintile, or school attendance within a single round of the survey.
2. p-value testing the difference between proportions in the pre- and post-mainstreaming coverage estimates for the sub-population of interest.
3. Wealth index variables were calculated for each household based on the methods adopted by the Demographic Health Survey (DHS) See Methods in text for details. Quintiles were defined separately for the pre-mainstreaming population and the post-mainstreaming population. The household wealth information was missing for 8 SAC in the pre-mainstreaming round, of whom 6 took MEB, and for 49 children in the post-mainstreaming round, of whom 34 took MEB. The p-value comes from the test of wealth category as the sole predictor in a logistic regression incorporating survey weights, in order to test for a significant trend with increasing wealth quintile.
4. Attendance was classified as "Good" if the student reported attending school 'always' or 'most of the time' and as "Poor" if the student reported attending school "Part-time", "Sometimes", "Rarely", or "Never". The categories of 'Not enrolled' and 'Poor attendance' were collapsed for analysis due to small numbers within districts. There were 34 SAC missing this variable in the pre-mainstreaming round, of whom 24 took MEB, and 34 SAC missing this variable in the post-mainstreaming round, of whom 19 took MEB.

**Table S4. Praziquantel Coverage Among School-Aged Children by Characteristic and District in Selected Villages Targeted for Schistosomiasis MDA, Pre- and Post-Mainstreaming**

|                                      | Pre-Mainstreaming (2021) |                         |                                     |                      | Post-Mainstreaming (2022) |                         |                                     |                      | Pre- vs. Post-<br>p-value <sup>2</sup> |
|--------------------------------------|--------------------------|-------------------------|-------------------------------------|----------------------|---------------------------|-------------------------|-------------------------------------|----------------------|----------------------------------------|
|                                      | SAC (5-14 years) (n)     | Took PZQ during MDA (n) | Weighted coverage estimate (95% CI) | p-value <sup>1</sup> | SAC (5-14 years) (n)      | Took PZQ during MDA (n) | Weighted coverage estimate (95% CI) | p-value <sup>1</sup> |                                        |
| <b>District: Bassa</b>               |                          |                         |                                     |                      |                           |                         |                                     |                      |                                        |
| <b>Bassa Total</b>                   | 1,405                    | 982                     | 69.9% (56.9 – 80.3%)                |                      | 1,293                     | 515                     | 39.8% (26.6 – 54.7%)                |                      | <b>0.002</b>                           |
| <b>Gender</b>                        |                          |                         |                                     |                      |                           |                         |                                     |                      |                                        |
| Male                                 | 723                      | 514                     | 71.1% (57.9 – 81.5%)                |                      | 673                       | 276                     | 41.0% (27.0 – 56.6%)                |                      |                                        |
| Female                               | 682                      | 468                     | 68.6% (55.4 – 79.4%)                | 0.26                 | 620                       | 239                     | 38.5% (25.7 – 53.3%)                | 0.44                 |                                        |
| <b>Wealth Quintile<sup>3</sup></b>   |                          |                         |                                     |                      |                           |                         |                                     |                      |                                        |
| Lowest 20%                           | 359                      | 272                     | 75.8% (62.1 – 85.6%)                |                      | 544                       | 174                     | 32.0% (15.1 – 55.4%)                |                      |                                        |
| >20-40%                              | 499                      | 338                     | 67.7% (46.6 – 83.5%)                |                      | 368                       | 169                     | 45.9% (29.1 – 63.7%)                |                      |                                        |
| >40-60%                              | 280                      | 207                     | 73.9% (54.7 – 86.9%)                |                      | 222                       | 108                     | 48.6% (30.6 – 67.1%)                |                      |                                        |
| >60-80%                              | 176                      | 112                     | 63.6% (47.6 – 77.1%)                |                      | 112                       | 53                      | 47.3% (16.7 – 80.1%)                |                      |                                        |
| Top 20%                              | 84                       | 48                      | 57.1% (44.0 – 69.3%)                | 0.29                 | 28                        | 6                       | 21.4% (4.5 – 61.3%)                 | 0.48                 |                                        |
| <b>School Attendance<sup>4</sup></b> |                          |                         |                                     |                      |                           |                         |                                     |                      |                                        |
| Unenrolled/poor                      | 221                      | 48                      | 21.7% (8.9 – 44.0%)                 |                      | 226                       | 44                      | 19.5% (5.9 – 48.2%)                 |                      |                                        |
| Good attendance                      | 1,177                    | 930                     | 79.0% (68.4 – 86.8%)                | <b>&lt;0.01</b>      | 1,062                     | 470                     | 44.3% (29.8 – 59.7%)                | <b>0.03</b>          |                                        |
| <b>School Type</b>                   |                          |                         |                                     |                      |                           |                         |                                     |                      |                                        |
| Private, boarding, other             | 378                      | 290                     | 76.7% (62.9 – 86.5%)                |                      | 236                       | 79                      | 33.5% (17.3 – 54.8%)                |                      |                                        |
| Public                               | 796                      | 636                     | 79.9% (67.5 – 88.4%)                | 0.61                 | 824                       | 375                     | 45.5% (29.2 – 62.8%)                | 0.29                 |                                        |
| <b>District: Egor<sup>5</sup></b>    |                          |                         |                                     |                      |                           |                         |                                     |                      |                                        |
| <b>Egor Total</b>                    | 27                       | 27                      | 100% (n/a)                          |                      | 130                       | 86                      | 66.2% (56.1 – 74.9%)                |                      | <b>&lt;0.01</b>                        |

|                                            | Pre-Mainstreaming (2021) |                         |                                     |                      | Post-Mainstreaming (2022) |                         |                                     |                      | Pre- vs. Post-p-value <sup>2</sup> |
|--------------------------------------------|--------------------------|-------------------------|-------------------------------------|----------------------|---------------------------|-------------------------|-------------------------------------|----------------------|------------------------------------|
|                                            | SAC (5-14 years) (n)     | Took PZQ during MDA (n) | Weighted coverage estimate (95% CI) | p-value <sup>1</sup> | SAC (5-14 years) (n)      | Took PZQ during MDA (n) | Weighted coverage estimate (95% CI) | p-value <sup>1</sup> |                                    |
| <b>Gender</b>                              |                          |                         |                                     |                      |                           |                         |                                     |                      |                                    |
| Male                                       | 16                       | 16                      | 100% (n/a)                          |                      | 57                        | 43                      | 75.4% (69.7 – 80.4%)                |                      |                                    |
| Female                                     | 11                       | 11                      | 100% (n/a)                          | n/a                  | 73                        | 43                      | 58.9% (47.9 – 69.1%)                | <b>&lt;0.01</b>      |                                    |
| <b>Wealth Quintile<sup>3</sup></b>         |                          |                         |                                     |                      |                           |                         |                                     |                      |                                    |
| Lowest 20%                                 | 0                        | n/a                     | n/a                                 |                      | 0                         | n/a                     | n/a                                 |                      |                                    |
| >20-40%                                    | 0                        | n/a                     | n/a                                 |                      | 0                         | n/a                     | n/a                                 |                      |                                    |
| >40-60%                                    | 11                       | 11                      | 100% (n/a)                          |                      | 0                         | n/a                     | n/a                                 |                      |                                    |
| >60-80%                                    | 10                       | 10                      | 100% (n/a)                          |                      | 85                        | 55                      | 64.7% (49.3 – 77.6%)                |                      |                                    |
| Top 20%                                    | 6                        | 6                       | 100% (n/a)                          | n/a                  | 45                        | 31                      | 68.9% (62.5 – 74.7%)                | 0.72                 |                                    |
| <b>School Attendance<sup>4</sup></b>       |                          |                         |                                     |                      |                           |                         |                                     |                      |                                    |
| Unenrolled/poor                            | 2                        | 2                       | 100% (n/a)                          |                      | 0                         | n/a                     | n/a                                 |                      |                                    |
| Good attendance                            | 25                       | 25                      | 100% (n/a)                          | n/a                  | 130                       | 86                      | 66.2% (56.1 – 74.9%)                | n/a                  |                                    |
| <b>School Type</b>                         |                          |                         |                                     |                      |                           |                         |                                     |                      |                                    |
| Private, boarding, other                   | 17                       | 17                      | 100% (n/a)                          |                      | 115                       | 73                      | 63.5% (60.8 – 66.1%)                |                      |                                    |
| Public                                     | 10                       | 10                      | 100% (n/a)                          | n/a                  | 10                        | 10                      | 100% (n/a)                          | n/a                  |                                    |
| <b>District: Ughelli South<sup>6</sup></b> |                          |                         |                                     |                      |                           |                         |                                     |                      |                                    |
| <b>Ughelli South Total</b>                 | 123                      | 107                     | 87.0% (73.4 – 94.2%)                |                      | 49                        | 47                      | 95.9% (n/a)                         |                      | 0.08                               |
| <b>Gender</b>                              |                          |                         |                                     |                      |                           |                         |                                     |                      |                                    |
| Male                                       | 62                       | 51                      | 82.3% (68.0 – 91.0%)                |                      | 21                        | 21                      | 100% (n/a)                          |                      |                                    |
| Female                                     | 61                       | 56                      | 91.8% (79.1 – 97.1%)                | <b>0.001</b>         | 28                        | 26                      | 92.9% (n/a)                         | n/a                  |                                    |
| <b>Wealth Quintile<sup>3</sup></b>         |                          |                         |                                     |                      |                           |                         |                                     |                      |                                    |
| Lowest 20%                                 | 61                       | 50                      | 82.0% (67.1 – 91.0%)                |                      | 5                         | 5                       | 100% (n/a)                          |                      |                                    |
| >20-40%                                    | 44                       | 40                      | 90.9% (76.4 – 96.9%)                |                      | 24                        | 23                      | 95.8% (n/a)                         |                      |                                    |

|                                      | Pre-Mainstreaming (2021) |                         |                                     |                      | Post-Mainstreaming (2022) |                         |                                     |                      | Pre- vs. Post-p-value <sup>2</sup> |
|--------------------------------------|--------------------------|-------------------------|-------------------------------------|----------------------|---------------------------|-------------------------|-------------------------------------|----------------------|------------------------------------|
|                                      | SAC (5-14 years) (n)     | Took PZQ during MDA (n) | Weighted coverage estimate (95% CI) | p-value <sup>1</sup> | SAC (5-14 years) (n)      | Took PZQ during MDA (n) | Weighted coverage estimate (95% CI) | p-value <sup>1</sup> |                                    |
| >40-60%                              | 16                       | 16                      | 100% (n/a)                          |                      | 19                        | 18                      | 94.8% (n/a)                         |                      |                                    |
| >60-80%                              | 1                        | 0                       | 0% (n/a)                            |                      | 1                         | 1                       | 100% (n/a)                          |                      |                                    |
| Top 20%                              | 1                        | 1                       | 100% (n/a)                          | 0.14                 | 0                         | n/a                     | n/a                                 | n/a                  |                                    |
| <b>School Attendance<sup>4</sup></b> |                          |                         |                                     |                      |                           |                         |                                     |                      |                                    |
| Unenrolled/poor                      | 4                        | 2                       | 50.0% (16.5 – 83.5%)                |                      | 1                         | 0                       | 0% (n/a)                            |                      |                                    |
| Good attendance                      | 119                      | 105                     | 88.2% (74.7 – 95.0%)                | <b>0.03</b>          | 48                        | 47                      | 97.9% (n/a)                         | n/a                  |                                    |
| <b>School Type</b>                   |                          |                         |                                     |                      |                           |                         |                                     |                      |                                    |
| Private, boarding, other             | 23                       | 14                      | 60.9% (27.9 – 86.2%)                |                      | 23                        | 22                      | 95.7% (n/a)                         |                      |                                    |
| Public                               | 99                       | 93                      | 93.9% (90.6 – 96.1%)                | 0.06                 | 24                        | 24                      | 100% (n/a)                          | n/a                  |                                    |
| <b>District: Wamba</b>               |                          |                         |                                     |                      |                           |                         |                                     |                      |                                    |
| <b>Wamba Total</b>                   | 1,037                    | 744                     | 71.7% (53.7 – 84.8%)                |                      | 910                       | 611                     | 67.1% (59.0 – 74.4%)                |                      | 0.61                               |
| <b>Gender</b>                        |                          |                         |                                     |                      |                           |                         |                                     |                      |                                    |
| Male                                 | 522                      | 362                     | 69.3% (48.9 – 84.3%)                |                      | 491                       | 324                     | 66.0% (57.2 – 73.8%)                |                      |                                    |
| Female                               | 515                      | 382                     | 74.2% (58.3 – 85.5%)                | 0.19                 | 419                       | 287                     | 68.5% (60.1 – 75.8%)                | 0.33                 |                                    |
| <b>Wealth Quintile<sup>3</sup></b>   |                          |                         |                                     |                      |                           |                         |                                     |                      |                                    |
| Lowest 20%                           | 171                      | 118                     | 69.0% (39.5 – 88.4%)                |                      | 186                       | 109                     | 58.6% (44.9 – 71.1%)                |                      |                                    |
| >20-40%                              | 172                      | 122                     | 70.9% (45.8 – 87.6%)                |                      | 211                       | 156                     | 73.9% (55.7 – 86.5%)                |                      |                                    |
| >40-60%                              | 273                      | 191                     | 70.0% (49.2 – 84.9%)                |                      | 238                       | 153                     | 64.3% (54.9 – 72.7%)                |                      |                                    |
| >60-80%                              | 320                      | 226                     | 70.6% (47.8 – 86.3%)                |                      | 214                       | 156                     | 72.9% (66.2 – 78.7%)                |                      |                                    |
| Top 20%                              | 100                      | 86                      | 86.0% (61.0 – 96.0%)                | 0.60                 | 53                        | 34                      | 64.2% (59.0 – 69.0%)                | 0.39                 |                                    |
| <b>School Attendance<sup>4</sup></b> |                          |                         |                                     |                      |                           |                         |                                     |                      |                                    |
| Unenrolled/poor                      | 17                       | 5                       | 29.4% (11.9 – 56.2%)                |                      | 82                        | 30                      | 36.6% (20.1 – 57.0%)                |                      |                                    |

|                                      | Pre-Mainstreaming (2021)       |                         |                                     |                      | Post-Mainstreaming (2022) |                         |                                     |                      | Pre- vs. Post-p-value <sup>2</sup> |
|--------------------------------------|--------------------------------|-------------------------|-------------------------------------|----------------------|---------------------------|-------------------------|-------------------------------------|----------------------|------------------------------------|
|                                      | SAC (5-14 years) (n)           | Took PZQ during MDA (n) | Weighted coverage estimate (95% CI) | p-value <sup>1</sup> | SAC (5-14 years) (n)      | Took PZQ during MDA (n) | Weighted coverage estimate (95% CI) | p-value <sup>1</sup> |                                    |
| <i>Good attendance</i>               | 1,011                          | 732                     | 72.4% (53.9 – 85.5%)                | <b>0.001</b>         | 822                       | 578                     | 70.3% (61.4 – 77.9%)                | <b>0.003</b>         |                                    |
| <b>School Type</b>                   |                                |                         |                                     |                      |                           |                         |                                     |                      |                                    |
| <i>Private, boarding, other</i>      | 157                            | 73                      | 46.5% (35.8 – 57.5%)                |                      | 212                       | 157                     | 74.1% (62.6 – 83.0%)                |                      |                                    |
| <i>Public</i>                        | 855                            | 659                     | 77.1% (55.0 – 90.2%)                | <b>0.002</b>         | 603                       | 411                     | 68.2% (57.9 – 76.9%)                | 0.32                 |                                    |
|                                      | <b>Total for all districts</b> |                         |                                     |                      |                           |                         |                                     |                      |                                    |
| <b>Total</b>                         | 2,592                          | 1,860                   | 72.5% (62.6 – 80.6%)                |                      | 2,382                     | 1,259                   | 55.4% (46.9 – 63.5%)                |                      | <b>&lt;0.01</b>                    |
| <b>Gender</b>                        |                                |                         |                                     |                      |                           |                         |                                     |                      |                                    |
| <i>Male</i>                          | 1,323                          | 943                     | 71.7% (60.9 – 80.5%)                |                      | 1,242                     | 664                     | 55.8% (47.1 – 64.3%)                |                      |                                    |
| <i>Female</i>                        | 1,269                          | 917                     | 73.4% (64.1 – 81.0%)                | 0.37                 | 1,140                     | 595                     | 54.8% (46.3 – 63.2%)                | 0.64                 |                                    |
| <b>Wealth Quintile<sup>3</sup></b>   |                                |                         |                                     |                      |                           |                         |                                     |                      |                                    |
| <i>Lowest 20%</i>                    | 591                            | 440                     | 74.8% (62.8 – 83.8%)                |                      | 735                       | 288                     | 41.0% (27.1 – 56.5%)                |                      |                                    |
| <i>&gt;20-40%</i>                    | 715                            | 500                     | 71.2% (56.0 – 82.8%)                |                      | 603                       | 348                     | 60.7% (46.1 – 73.5%)                |                      |                                    |
| <i>&gt;40-60%</i>                    | 580                            | 425                     | 73.7% (60.3 – 83.8%)                |                      | 479                       | 279                     | 60.3% (49.7 – 70.1%)                |                      |                                    |
| <i>&gt;60-80%</i>                    | 507                            | 348                     | 69.0% (52.9 – 81.5%)                |                      | 412                       | 265                     | 65.5% (54.0 – 75.5%)                |                      |                                    |
| <i>Top 20%</i>                       | 191                            | 141                     | 75.8% (56.2 – 88.5%)                | 0.81                 | 126                       | 71                      | 58.5% (46.3 – 69.7%)                | <b>0.03</b>          |                                    |
| <b>School Attendance<sup>4</sup></b> |                                |                         |                                     |                      |                           |                         |                                     |                      |                                    |
| <i>Unenrolled/poor</i>               | 244                            | 57                      | 24.2% (11.5 – 43.8%)                |                      | 309                       | 74                      | 24.8% (12.1 – 44.2%)                |                      |                                    |
| <i>Good attendance</i>               | 2,332                          | 1,792                   | 77.0% (67.1 – 84.6%)                | <b>&lt;0.01</b>      | 2,062                     | 1,181                   | 59.7% (51.0 – 67.8%)                | <b>&lt;0.01</b>      |                                    |
| <b>School Type</b>                   |                                |                         |                                     |                      |                           |                         |                                     |                      |                                    |
| <i>Private, boarding, other</i>      | 575                            | 394                     | 67.0% (56.0 – 76.3%)                |                      | 586                       | 331                     | 59.9% (49.6 – 69.3%)                |                      |                                    |
| <i>Public</i>                        | 1,760                          | 1,398                   | 79.9% (67.8 – 88.3%)                | <b>0.045</b>         | 1,461                     | 820                     | 58.2% (47.9 – 67.9%)                | 0.79                 |                                    |

| Pre-Mainstreaming (2021) |                         |                                     |                      | Post-Mainstreaming (2022) |                         |                                     |                      | Pre- vs. Post-<br>p-value <sup>2</sup> |
|--------------------------|-------------------------|-------------------------------------|----------------------|---------------------------|-------------------------|-------------------------------------|----------------------|----------------------------------------|
| SAC (5-14 years) (n)     | Took PZQ during MDA (n) | Weighted coverage estimate (95% CI) | p-value <sup>1</sup> | SAC (5-14 years) (n)      | Took PZQ during MDA (n) | Weighted coverage estimate (95% CI) | p-value <sup>1</sup> |                                        |

Abbreviations: MDA = Mass drug administration; n/a = Not applicable; PZQ = Praziquantel; SAC = School-aged children, 5-14 years

*Bolded p-values are those that are <0.05.*

1. p-value testing the difference between proportions of coverage by category of gender, wealth quintile, or school attendance within a single round of the survey.
2. p-value testing the difference between proportions in the pre- and post-mainstreaming coverage estimates for the sub-population of interest.
3. Wealth index variables were calculated for each household based on the methods adopted by the Demographic Health Survey (DHS) See Methods in text for details. Quintiles were defined separately for the pre-mainstreaming population and the post-mainstreaming population. The household wealth information was missing for 8 SAC in the pre-mainstreaming round, of whom 6 took PZQ, and for 27 children in the post-mainstreaming round, of whom 8 took PZQ. The p-value from this analysis comes from the test of wealth category as the sole predictor in a logistic regression incorporating survey weights, in order to test for a significant trend with increasing wealth quintile.
4. Attendance was classified as "Good" if the student reported attending school 'always' or 'most of the time' and as "Poor" if the student reported attending school "Part-time", "Sometimes", "Rarely", or "Never". The categories of 'Not enrolled' and 'Poor attendance' were collapsed for analysis due to small numbers within districts. The variable was missing for 16 SAC in the pre-mainstreaming round, of which 11 took PZQ, and for 11 SAC in the post-mainstreaming round, of which 4 took PZQ.
5. The pre-mainstreaming (2021) survey in Egor included only one community that was targeted for PZQ MDA, so there was no variance in Egor pre-mainstreaming coverage estimates, and no confidence intervals could be reported.
6. The post-mainstreaming (2022) survey in Ughelli South included only one community that was targeted for PZQ MDA, so there was no variance in Ughelli South post-mainstreaming coverage estimates, and no confidence intervals could be reported.
